# Supplementary material for: Dimethyl disulfide exerts antifungal activity against Sclerotinia minor by damaging its membrane and induces systemic resistance in host plants
Source: PubMed Central journal article supplement (PMC7162885; doi:10.1038/s41598-020-63382-0), 2020-04-16
Supplement: 41598_2020_63382_MOESM1_ESM.pdf [file 41598_2020_63382_MOESM1_ESM.pdf]

1 **Supplementary information**

2  
3 **Dimethyl disulfide exerts antifungal activity against *Sclerotinia minor* by damaging its**  
4 **membrane and induces systemic resistance in host plants**

5  
6 Swati Tyagi<sup>1</sup>, Kui-Jae Lee<sup>1</sup>, Pratyosh Shukla<sup>2\*</sup> & Jong-Chan Chae<sup>1\*</sup>

7  
8 <sup>1</sup>Division of Biotechnology, Jeonbuk National University, Iksan 54596, Republic of Korea.

9 <sup>2</sup>Enzyme Technology and Protein Bioinformatics Laboratory, Department of Microbiology,  
10 Maharshi Dayanand University, Rohtak 124001, Haryana, India.

11  
12  
13  
14 \*Corresponding authors

15

16 **Supplementary Table 1.** List of primers used in this study

| Name     | Primer sequence (5' → 3') | Target gene                                 | Gene ID   |
|----------|---------------------------|---------------------------------------------|-----------|
| ACT2-F   | CCAGGCACACAGGTGTTATG      | Actin                                       | 101267214 |
| Act2-R   | GCCTCAGTCAGGAGAACAGG      |                                             |           |
| EXP2-F   | CGAACCCGTCTCTACCTAACA     | Expansin                                    | 543582    |
| EXP2-R   | GGACGATACCGGCTTTGTATTT    |                                             |           |
| EXPA5-F  | ACTTGAGCCTAAGCTTGTAGTC    | Expansin                                    | 543558    |
| EXPA5-R  | CCGTATCCCGTGCTGTATAAAT    |                                             |           |
| ARF5-F   | AGCTCCAATAGGCCAGGATT      | Auxin response factor                       | 100736448 |
| ARF5-R   | ACTGTGCTCCCGCTGTTACT      |                                             |           |
| ACS2-F   | ATGTCGAGTTTCGGTTTAGTATCT  | 1-amino-cyclopropane-1-carboxylate synthase | 606304    |
| ACS2-R   | CTAACCTCATCGCGCTTTCT      |                                             |           |
| RAP2-7-F | GTCACTCCAGTGCCAGTATTT     | Ethylene-responsive transcription factor    | 101252772 |
| RAP2-7-R | TAGTTGGTTGCTTGGTGGTAG,    |                                             |           |
| APX2-F   | CAGGCTGTGACCACTTGAGA      | Ascorbate peroxidase                        | 778224    |
| APX2-R   | TCAAAACCAGAACGCTCCTT      |                                             |           |
| PA2-F    | AGAAGAGCAAATCAAGGAGGAG    | Peroxidase                                  | 101254854 |
| PA2-R    | AGTAATGGTGAGGCCAACAG      |                                             |           |
| PR1-F    | AAAATGGTGGGCAAATTCAA      | Pathogenesis-related protein                | 101267538 |
| PR1-R    | TTTTTCTCATCAGCCCAAGC      |                                             |           |
| PR5-F    | GAGTCCTGGATTGCAAAGGA      | Pathogenesis-related protein                | 101264959 |
| PR5-R    | AAGTGAACCAGGGCATTAC       |                                             |           |

17 **Supplementary Figure 1.** Effect of DMDS on fungal growth. (a) Dual plate assay showing the effect  
18 of DMDS on fungal growth, (b) fungal growth inhibition, (c) sclerotia formation. Asterisks indicate  
19 significant change in the values calculated by Student's *t*-test (\*\*\*,  $p < 0.001$ ).

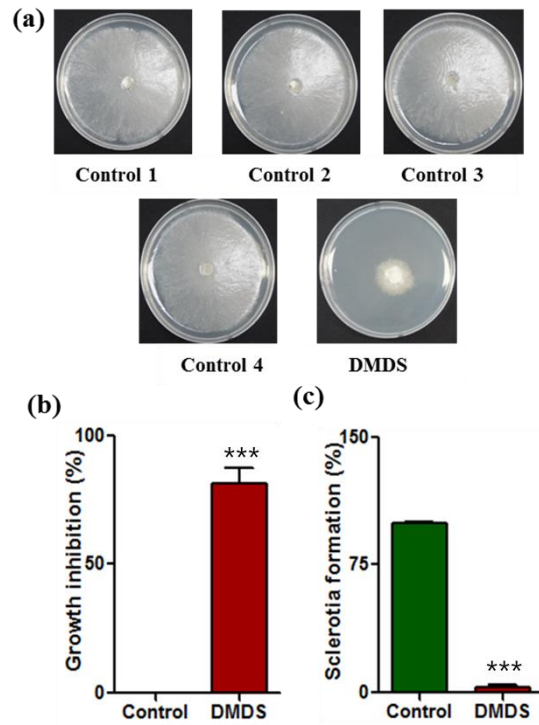

20

21

22

23 **Supplementary Figure 2.** Relative enhancement of different plant growth parameters in plate and pot  
24 assays. Small letters above the error bars represent significant differences according to the  
25 Bonferroni's multiple comparison test ( $p$  value = 0.05).

26

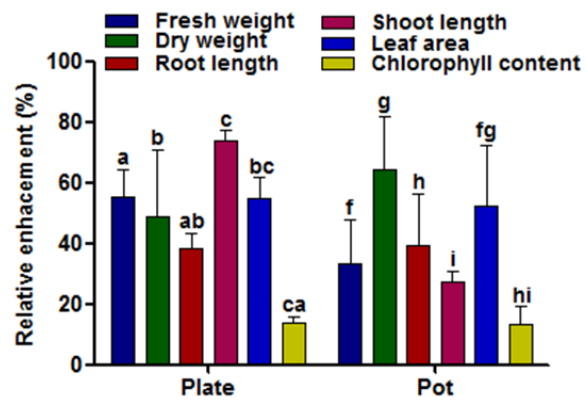

27

28

29 **Supplementary Figure 3.** Electrolyte leakage. Asterisk indicates a significant change in the values  
30 calculated by Student's *t*-test (\*\*\*,  $p < 0.001$ ).

31

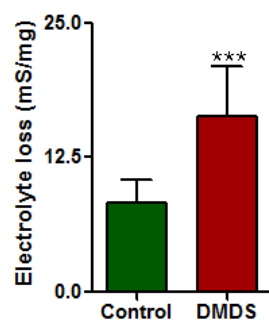

32

33

34 **Supplementary Figure 4.** Chromatogram showing ergosterol (a) Standard (b) Control (c) DMDS.  
35 Ergosterol was determined by HPLC Spectra-Physics equipment with UV 100 detector and a  
36 Supelcosil C18 column at room temperature. The mobile phase was HPLC grade methanol:  
37 acetonitrile (80:20 v/v). The retention time in these conditions was about  $24.5 \pm 0.2$  min at a flow rate  
38 of 0.6 mL/min.

39

40

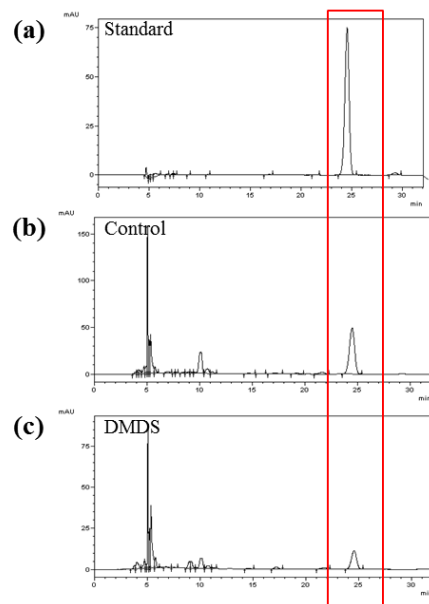

41
